# Supplementary material for: Soluble POSTN is a novel biomarker complementing CA153 and CEA for breast cancer diagnosis and metastasis prediction
Source: PubMed Central journal article supplement (PMC9281047; doi:10.1186/s12885-022-09864-y), 2022-07-12

# Supplementary Figure 1

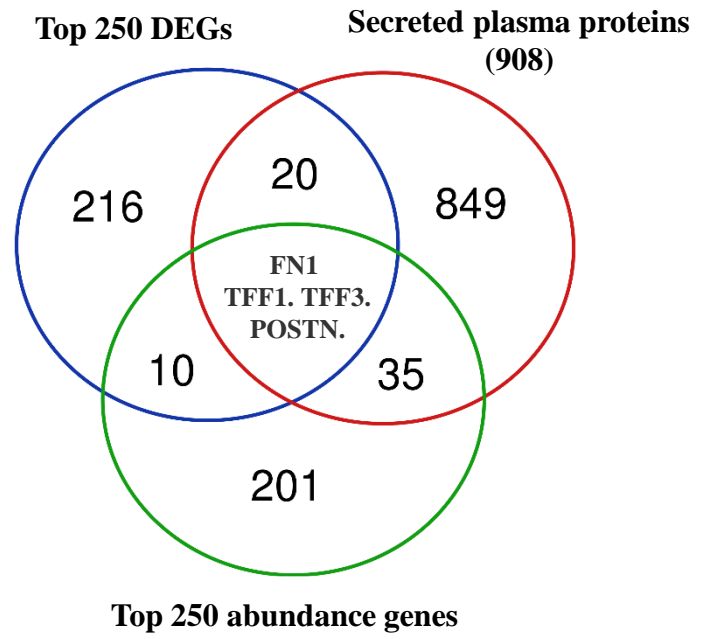

# Supplementary Figure 2

A

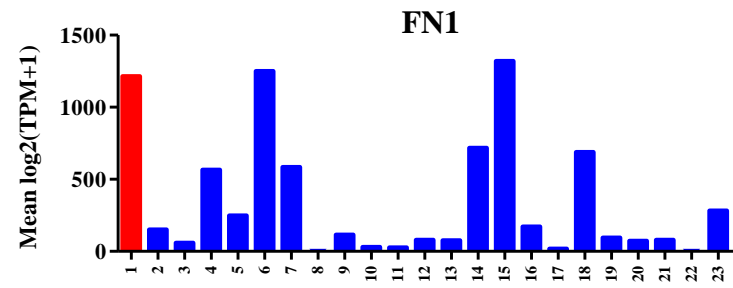

B

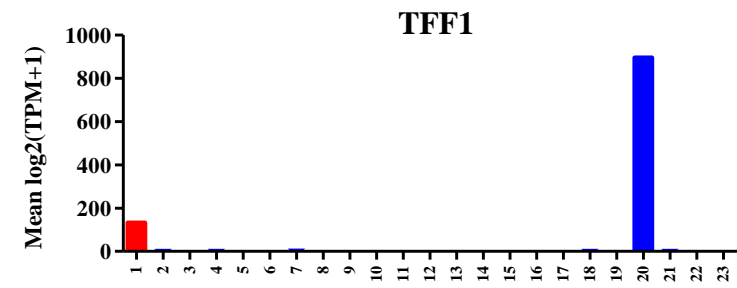

C

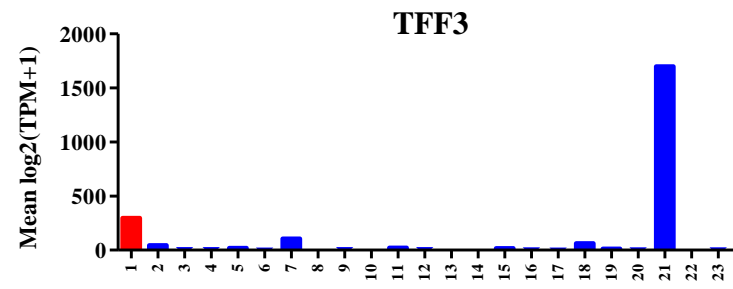

D

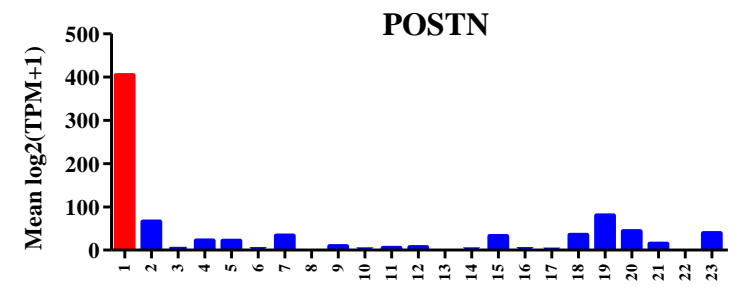

# Supplementary Figure 3

A

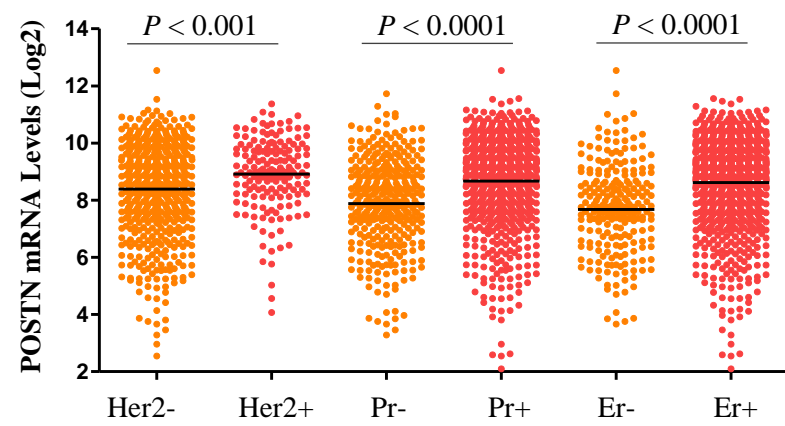

B

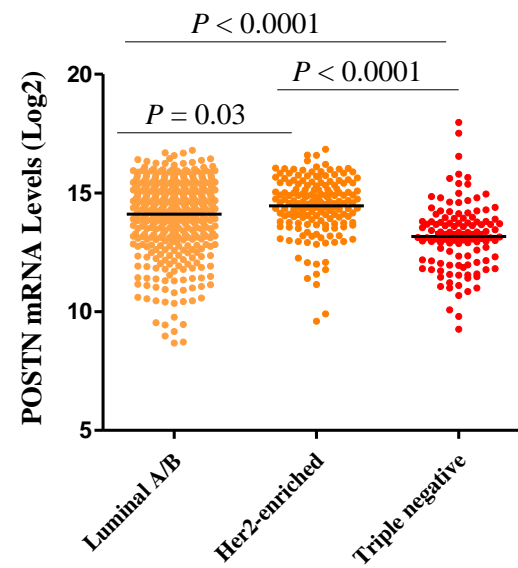

# Supplementary Figure 4

A

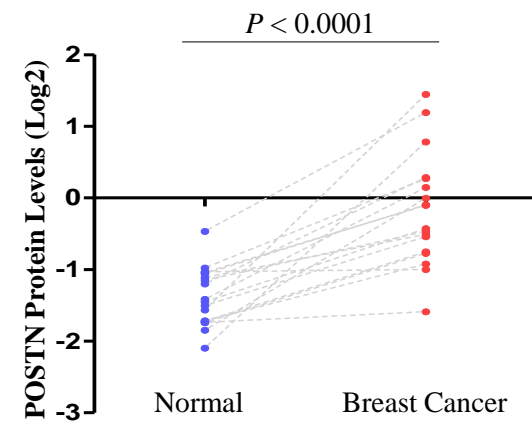

B

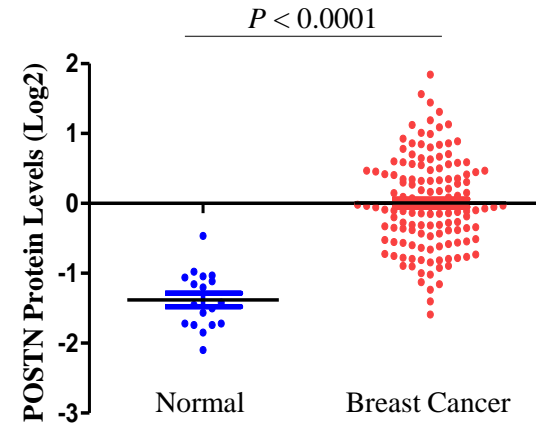

# Supplementary Figure 5

A

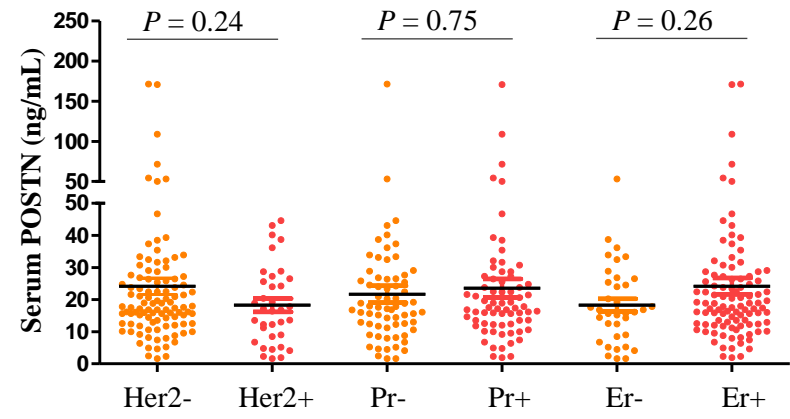

B

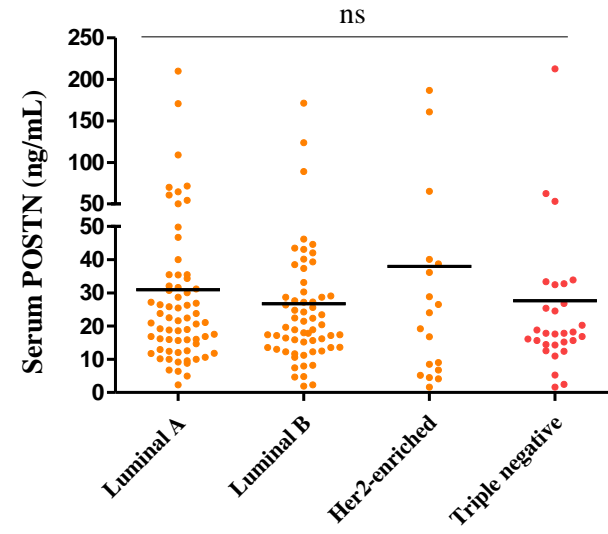

Supplement: 12885_2022_9864_MOESM1_ESM.pdf [file 12885_2022_9864_MOESM1_ESM.pdf]
